# Supplementary material for: Myoepithelial cell-driven acini contraction in response to oxytocin receptor stimulation is impaired in lacrimal glands of Sjögren’s syndrome animal models
Source: PubMed Central journal article supplement (PMC6028591; doi:10.1038/s41598-018-28227-x), 2018-07-02

# **Myoepithelial cell-driven acini contraction in response to oxytocin receptor stimulation is impaired in lacrimal glands of Sjögren's syndrome animal models**

Dillon Hawley<sup>1</sup>, Xin Tang<sup>2</sup>, Tatiana Zyrianova<sup>2</sup>, Mihir Shah<sup>3</sup>, Srikanth Janga<sup>3</sup>, Alexandra Letourneau<sup>1</sup>, Martin Schicht<sup>4</sup>, Friedrich Paulsen<sup>4</sup>, Sarah Hamm-Alvarez<sup>3,5</sup>, Helen P. Makarenkova<sup>2</sup>, and Driss Zoukhri<sup>1,6\*</sup>

<sup>1</sup>Department of Comprehensive Care, Tufts University School of Dental Medicine, Boston, MA, USA

<sup>2</sup>Department of Molecular Medicine, The Scripps Research Institute, La Jolla, CA, USA

<sup>3</sup>Department of Ophthalmology, USC Roski Eye Institute, Keck School of Medicine of University of Southern California, Los Angeles, CA, USA

<sup>4</sup>Department of Anatomy II, Friedrich Alexander University Erlangen-Nürnberg, Erlangen, Germany

<sup>5</sup>University of Southern California School of Pharmacy, Los Angeles, CA, USA

<sup>6</sup>Department of Ophthalmology, Tufts University School of Medicine, Boston, MA, USA

Driss Zoukhri: [driss.zoukhri@tufts.edu](mailto:driss.zoukhri@tufts.edu) (\*corresponding author)

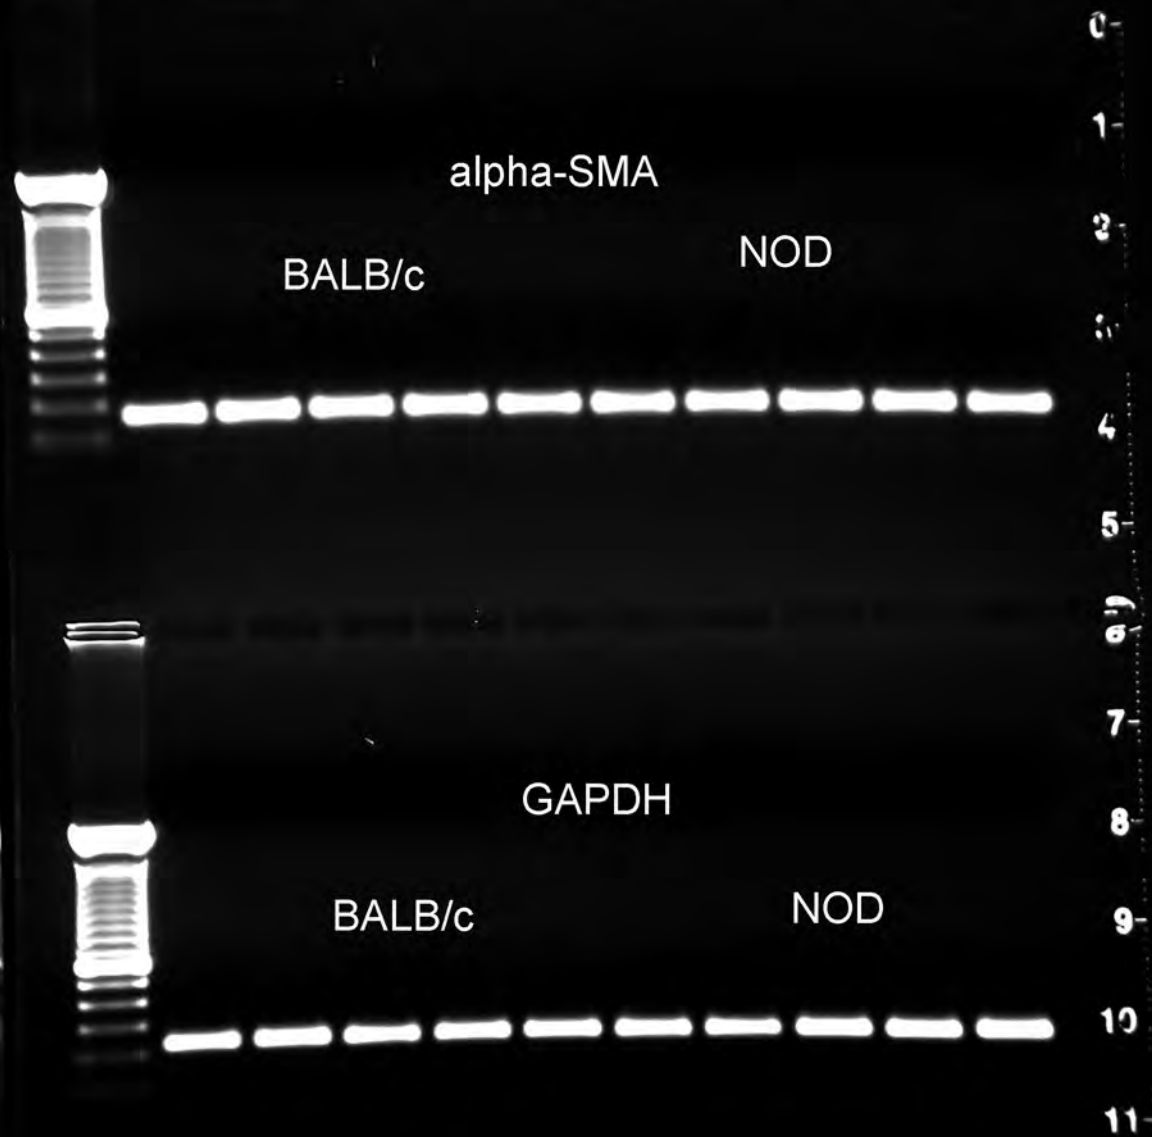

BALB/c

Calponin

Caldesmon

GAPDH

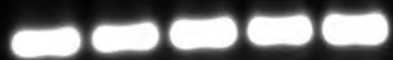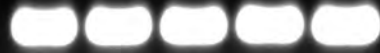

0  
1  
2  
3  
4  
5  
6  
7  
8  
9

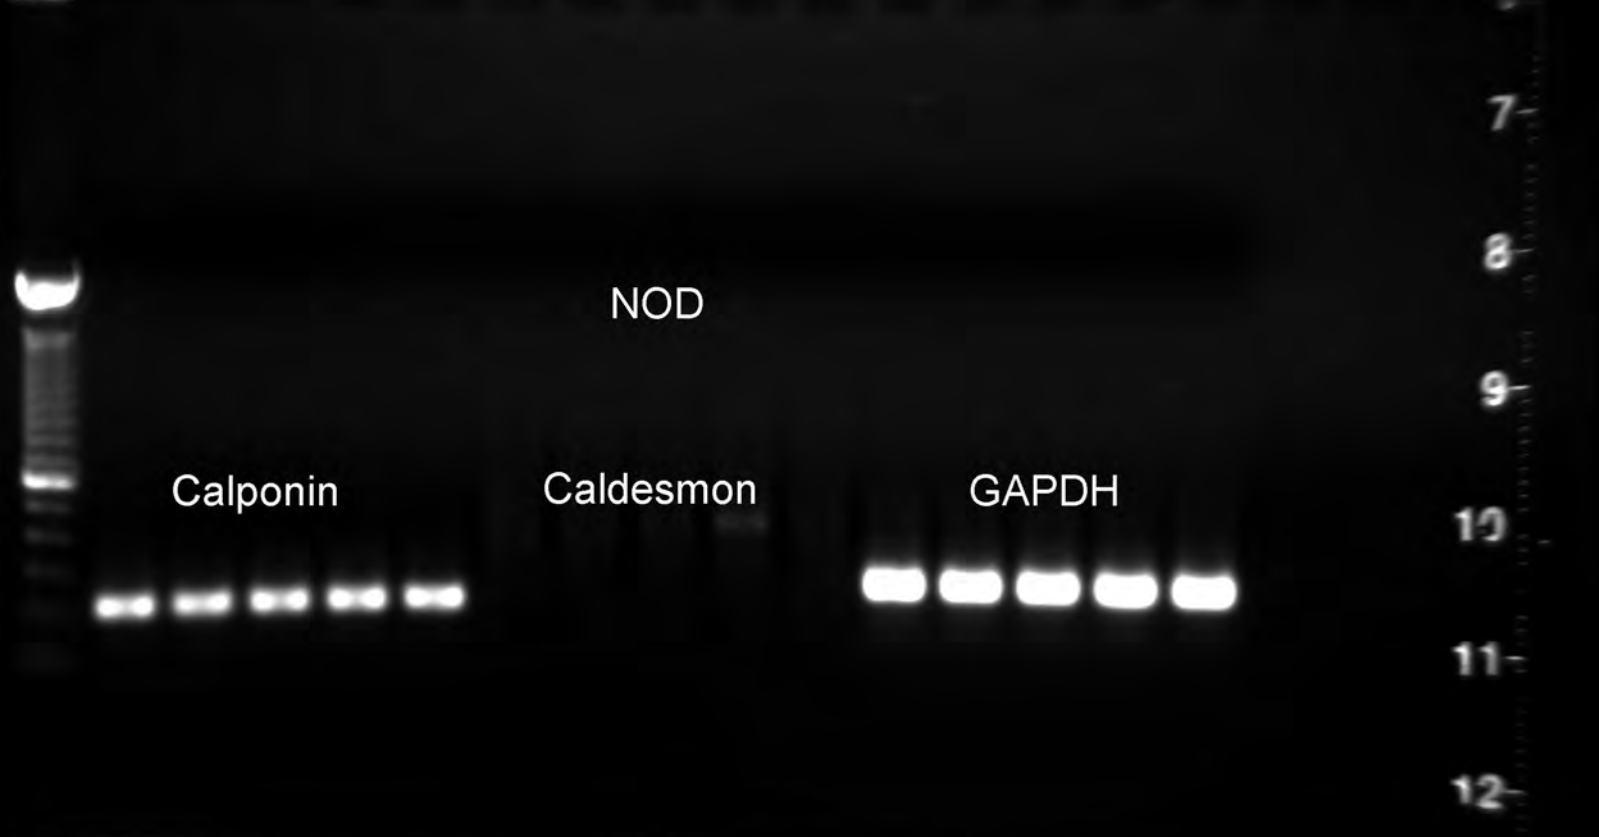

NOD

Calponin

Caldesmon

GAPDH

7

8

9

10

11

12

Calponin

BALB/c

NOD

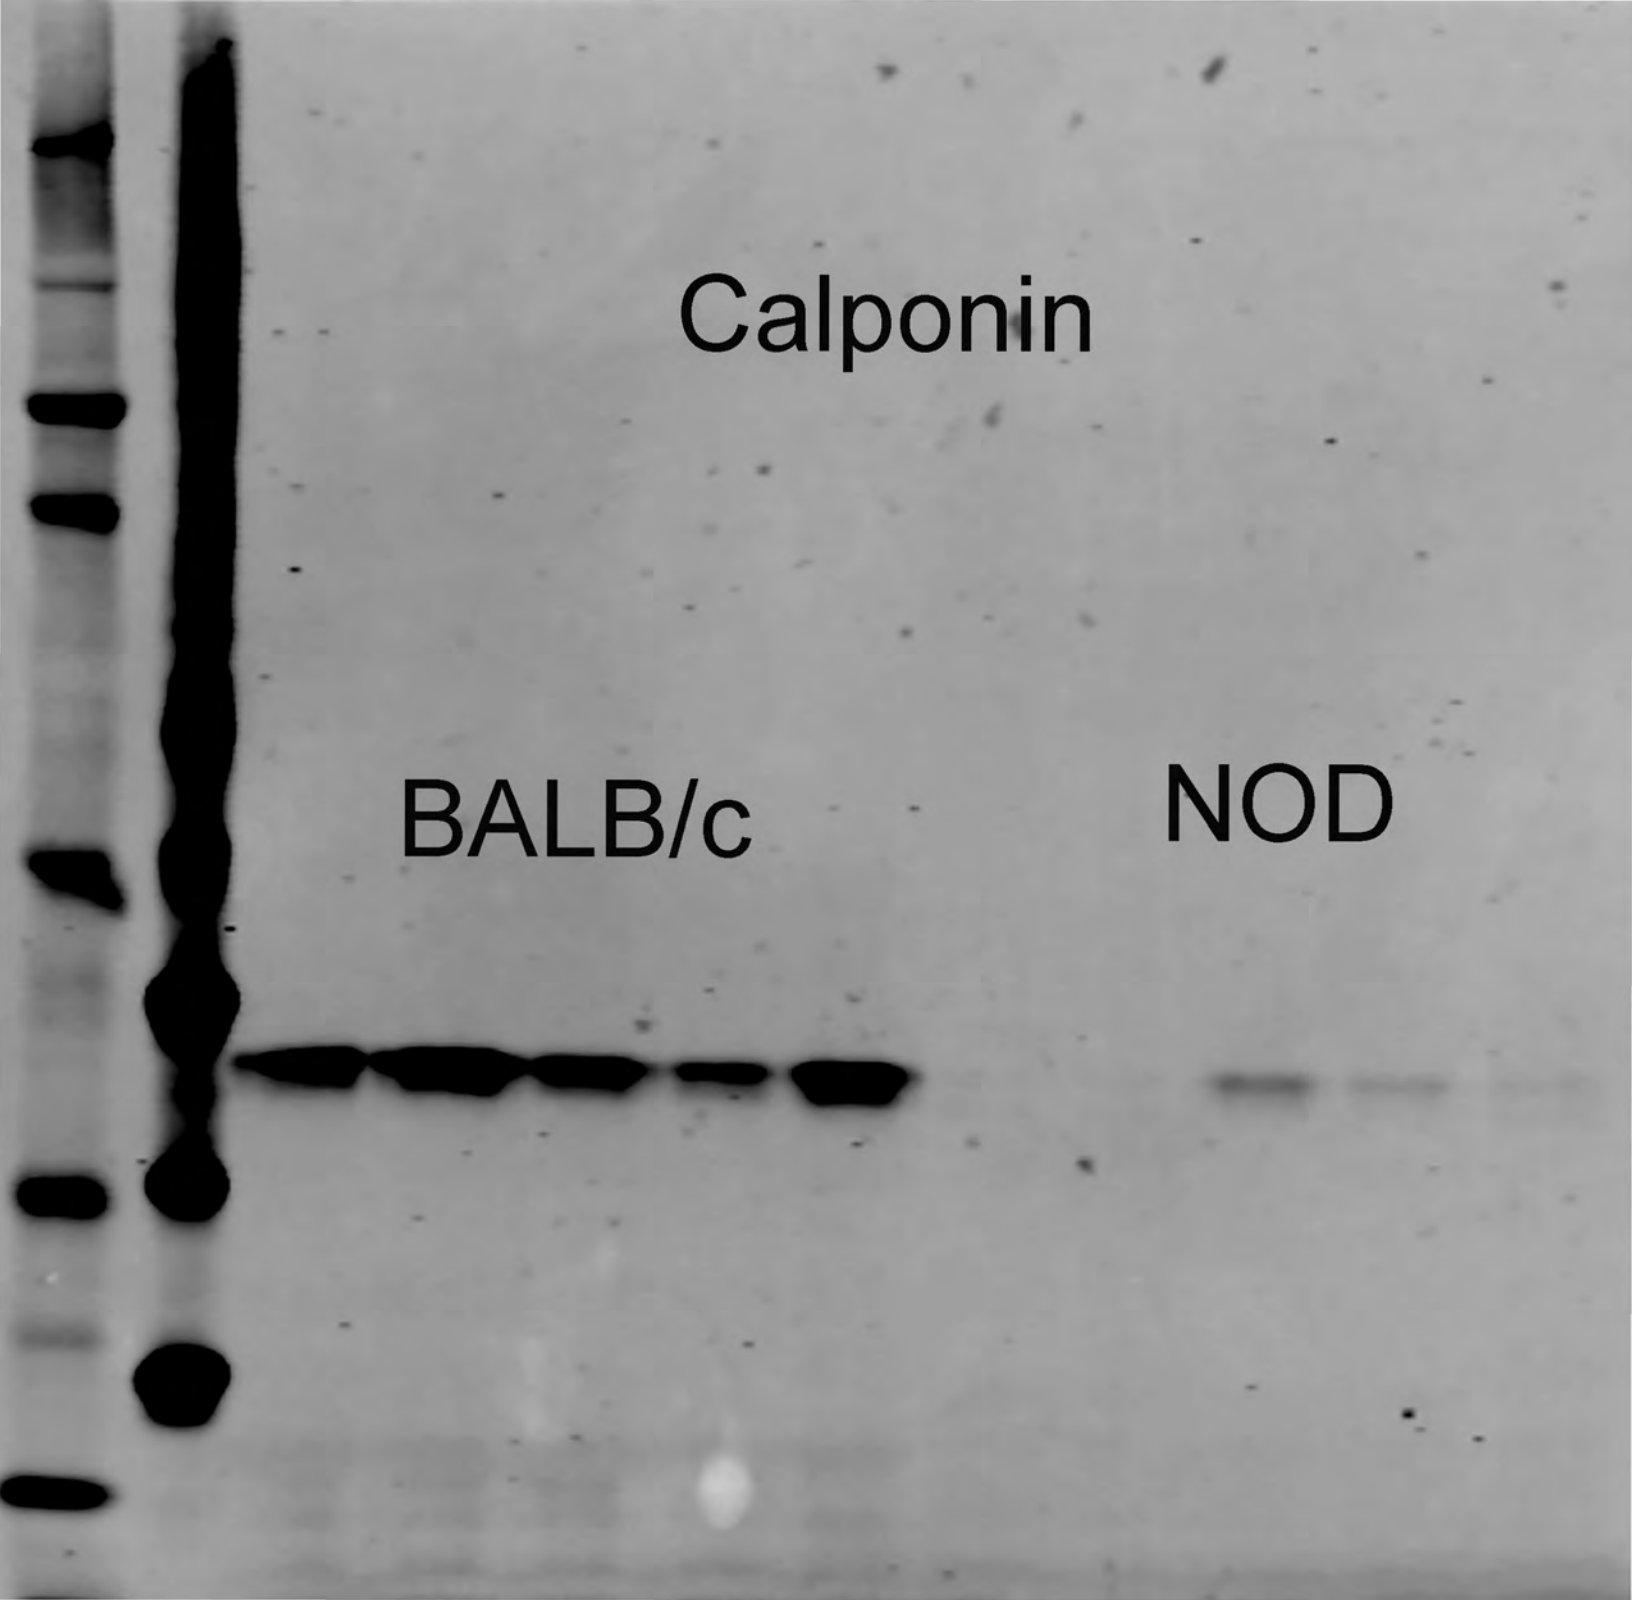

# E-Cadherin

BALB/c

NOD

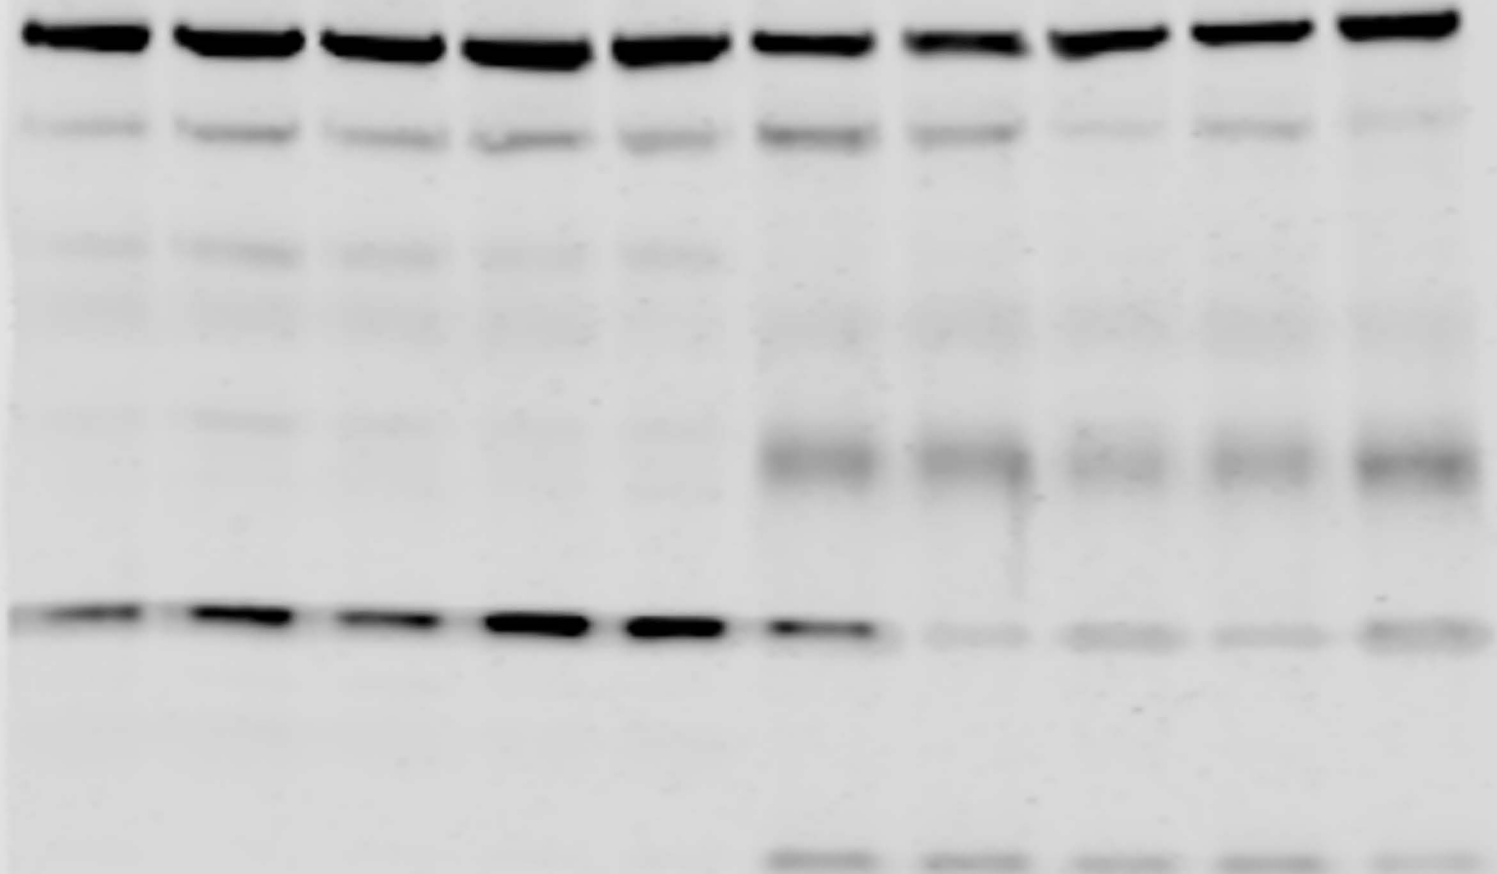

# Oxytocin Receptor

BALB/c

NOD

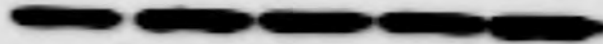

# alpha-SMA

Non-specific band

BALB/c

NOD

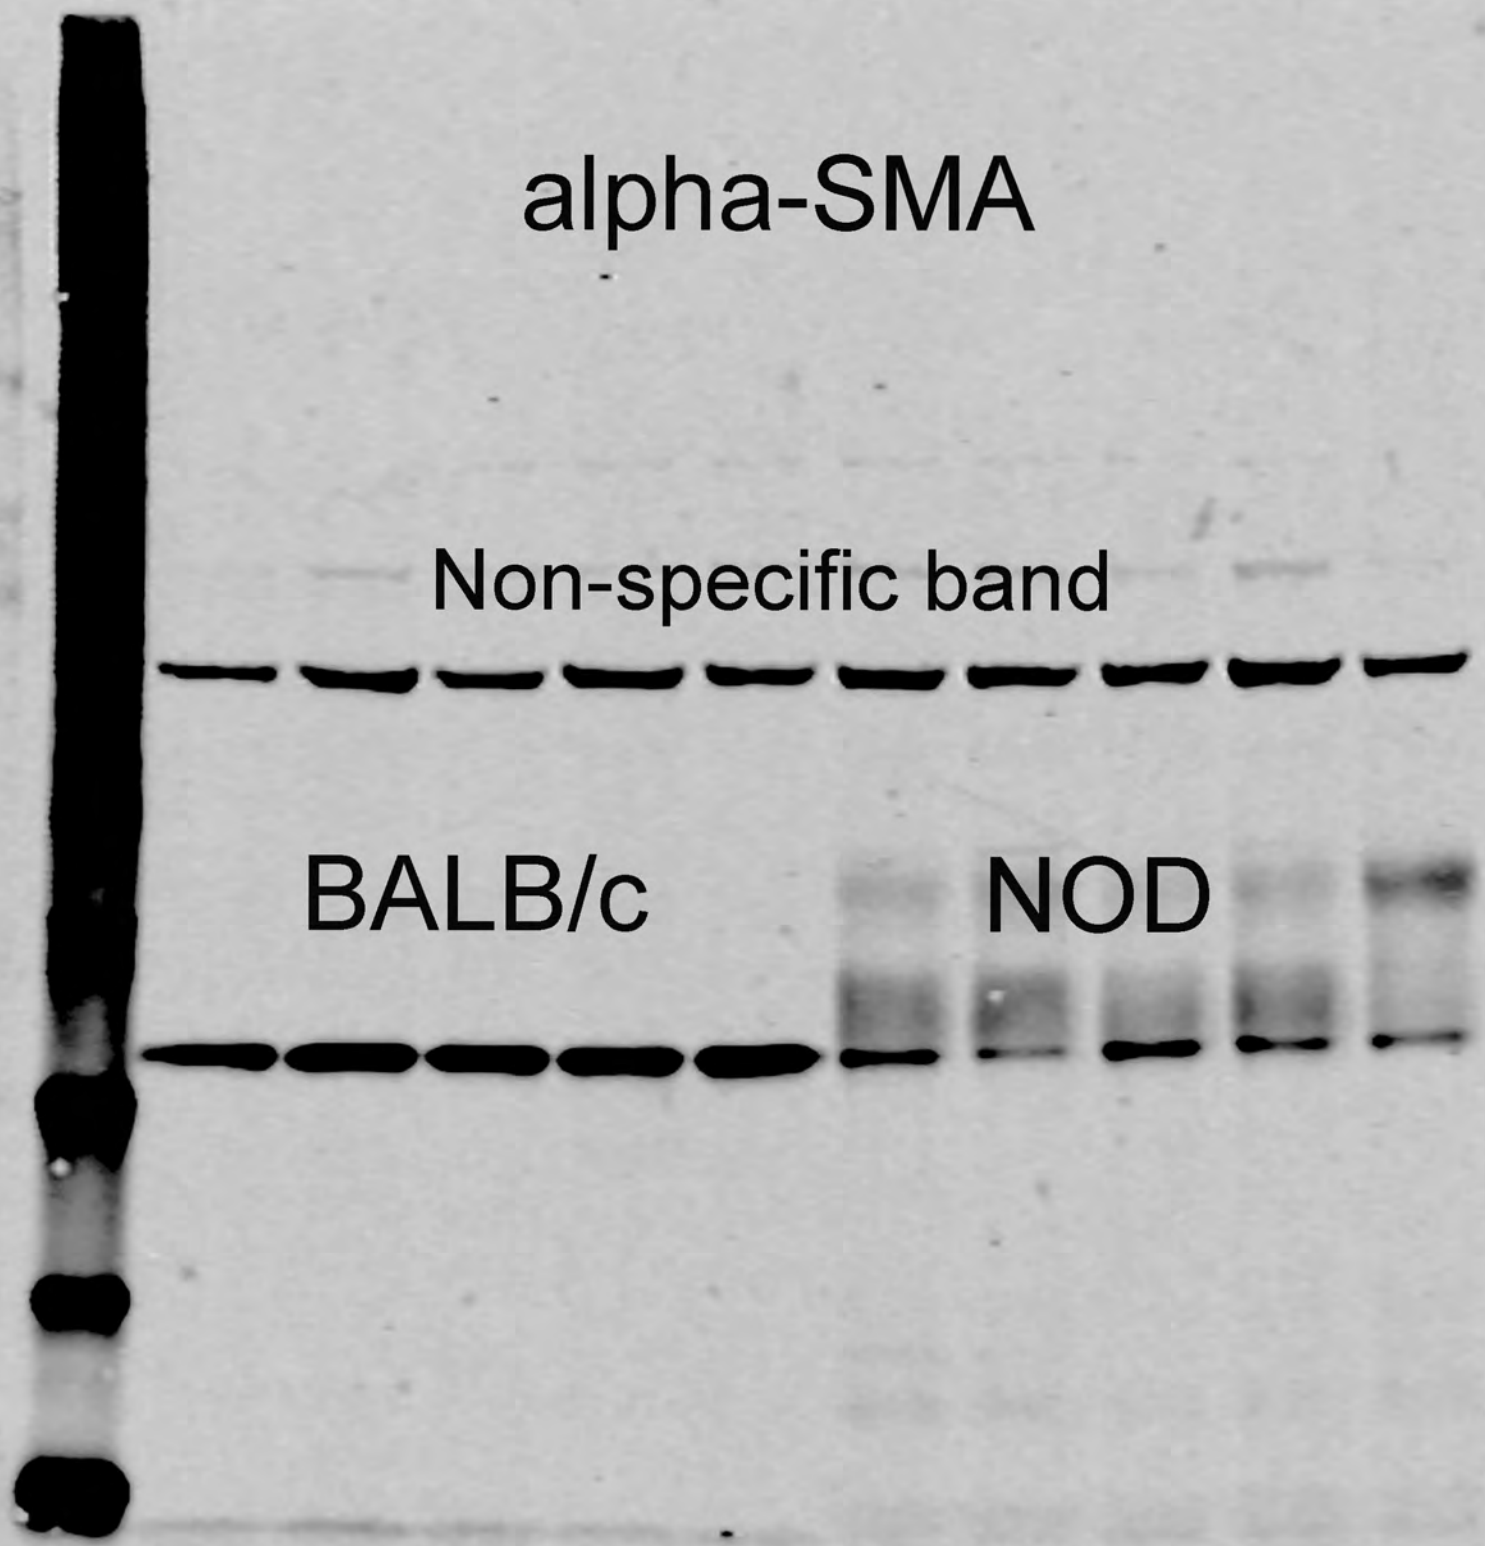



# Oxytocin Receptor

Mouse LG Human LG

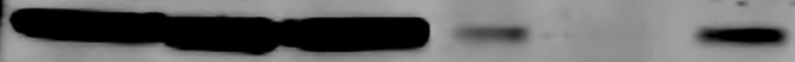

| <b>Fig 1D</b>     |               |            |
|-------------------|---------------|------------|
|                   | <b>BALB/c</b> | <b>NOD</b> |
| <b>AVG</b>        | 79.92         | 54.24      |
| <b>STDEV</b>      | 11.67         | 12.15      |
| <b>% Decrease</b> |               | 32.13      |

| <b>Fig 1F</b>     |                |                |
|-------------------|----------------|----------------|
|                   | <b>MRL +/+</b> | <b>MRL/lpr</b> |
| <b>AVG</b>        | 69.10          | 58.87          |
| <b>STDEV</b>      | 9.29           | 15.53          |
| <b>% Decrease</b> |                | 14.82          |

| <b>Fig 2A</b>     |               |            |            |            |             |
|-------------------|---------------|------------|------------|------------|-------------|
|                   | <b>BALB/C</b> |            |            |            |             |
|                   | <b>50</b>     | <b>100</b> | <b>150</b> | <b>200</b> | <b>More</b> |
| <b>AVG</b>        | 45.96         | 28.90      | 12.77      | 6.23       | 6.15        |
| <b>STDEV</b>      | 3.53          | 2.28       | 1.54       | 2.72       | 2.12        |
|                   | <b>NOD</b>    |            |            |            |             |
|                   | <b>50</b>     | <b>100</b> | <b>150</b> | <b>200</b> | <b>More</b> |
| <b>AVG</b>        | 64.54         | 25.04      | 6.17       | 2.37       | 1.87        |
| <b>STDEV</b>      | 8.67          | 3.06       | 2.25       | 1.59       | 2.49        |
| <b>% Decrease</b> | -40.44        | 13.34      | 51.69      | 61.92      | 69.51       |

| <b>Fig 2B</b>     |                |            |            |            |             |
|-------------------|----------------|------------|------------|------------|-------------|
|                   | <b>MRL +/+</b> |            |            |            |             |
|                   | <b>50</b>      | <b>100</b> | <b>150</b> | <b>200</b> | <b>More</b> |
| <b>AVG</b>        | 52.58          | 29.01      | 9.78       | 4.64       | 3.98        |
| <b>STDEV</b>      | 3.67           | 1.03       | 0.85       | 1.03       | 1.57        |
|                   | <b>MRL/lpr</b> |            |            |            |             |
|                   | <b>50</b>      | <b>100</b> | <b>150</b> | <b>200</b> | <b>More</b> |
| <b>AVG</b>        | 61.83          | 26.19      | 6.73       | 2.37       | 2.88        |
| <b>STDEV</b>      | 10.89          | 4.47       | 2.62       | 1.58       | 2.80        |
| <b>% Decrease</b> | -17.58         | 9.74       | 31.23      | 48.91      | 27.52       |

| <b>Fig 3B</b>     |               |              |            |              |                   |
|-------------------|---------------|--------------|------------|--------------|-------------------|
|                   | <b>BALB/c</b> |              | <b>NOD</b> |              | <b>% Decrease</b> |
|                   | <b>AVG</b>    | <b>STDEV</b> | <b>AVG</b> | <b>STDEV</b> |                   |
| <b>α-SMA</b>      | 22.80         | 2.77         | 9.20       | 2.49         | 59.65             |
| <b>Calponin</b>   | 29.71         | 13.56        | 1.54       | 2.10         | 94.82             |
| <b>Caldesmon</b>  | 1.47          | 0.24         | 3.93       | 2.64         | -166.99           |
| <b>E-Cadherin</b> | 29.98         | 2.48         | 24.11      | 5.16         | 19.57             |

|               | BALB/c |       | NOD  |       | % Decrease |
|---------------|--------|-------|------|-------|------------|
|               | AVG    | STDEV | AVG  | STDEV |            |
| $\alpha$ -SMA | 1.19   | 0.04  | 1.13 | 0.07  | 4.87       |
| Calponin      | 0.93   | 0.05  | 0.89 | 0.01  | 4.29       |

|                       | BALB/c  |          | NOD     |          |
|-----------------------|---------|----------|---------|----------|
|                       | Vehicle | Oxytocin | Vehicle | Oxytocin |
| AVG                   | 3287.60 | 2617.70  | 3823.85 | 3599.50  |
| STDEV                 | 124.74  | 91.42    | 136.49  | 161.03   |
| % Decrease to Vehicle |         | 20.38    |         | 5.87     |
| % Increase to Control |         |          | 16.31   |          |

|                       | BALB/c  |          | NOD     |          |
|-----------------------|---------|----------|---------|----------|
|                       | Vehicle | Oxytocin | Vehicle | Oxytocin |
| AVG                   | 214.96  | 191.53   | 234.14  | 222.33   |
| STDEV                 | 3.87    | 3.75     | 4.28    | 4.40     |
| % Decrease to Vehicle |         | 10.90    |         | 5.05     |
| % Increase to Control |         |          | 8.92    |          |

|                       | BALB/c  |          | NOD     |          |
|-----------------------|---------|----------|---------|----------|
|                       | Vehicle | Oxytocin | Vehicle | Oxytocin |
| AVG                   | 78.58   | 68.08    | 85.53   | 80.77    |
| STDEV                 | 1.49    | 1.34     | 1.73    | 8.12     |
| % Decrease to Vehicle |         | 13.36    |         | 5.57     |
| % Increase to Control |         |          | 8.85    |          |

|      | BALB/c |       | NOD  |       | % Decrease |
|------|--------|-------|------|-------|------------|
|      | AVG    | STDEV | AVG  | STDEV |            |
| OXTR | 11.81  | 3.75  | 0.15 | 0.20  | 98.73      |

**Supplemental FACS plot of sorted GFP+ myoepithelial cells.**

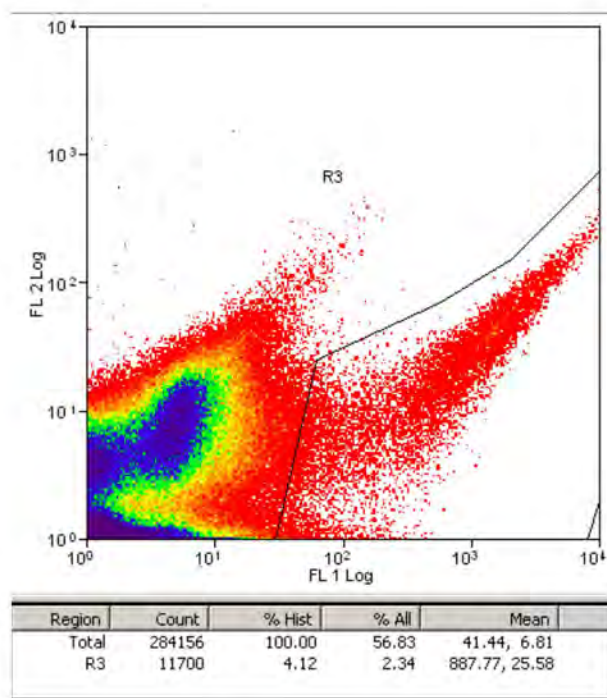

Supplemental figures showing lacrimal gland blood vessel staining, using an antibody against PECAM-1, in BALB/c and NOD mice (Fig 1). The percent area covered by blood vessels was calculated using ImageJ software (Fig 2). Figure 3 shows a lower magnification of PECAM-1 stained blood vessels from BALB/c and NOD mice lacrimal glands.

**Figure 1**

**NOD**

**BALB/c**

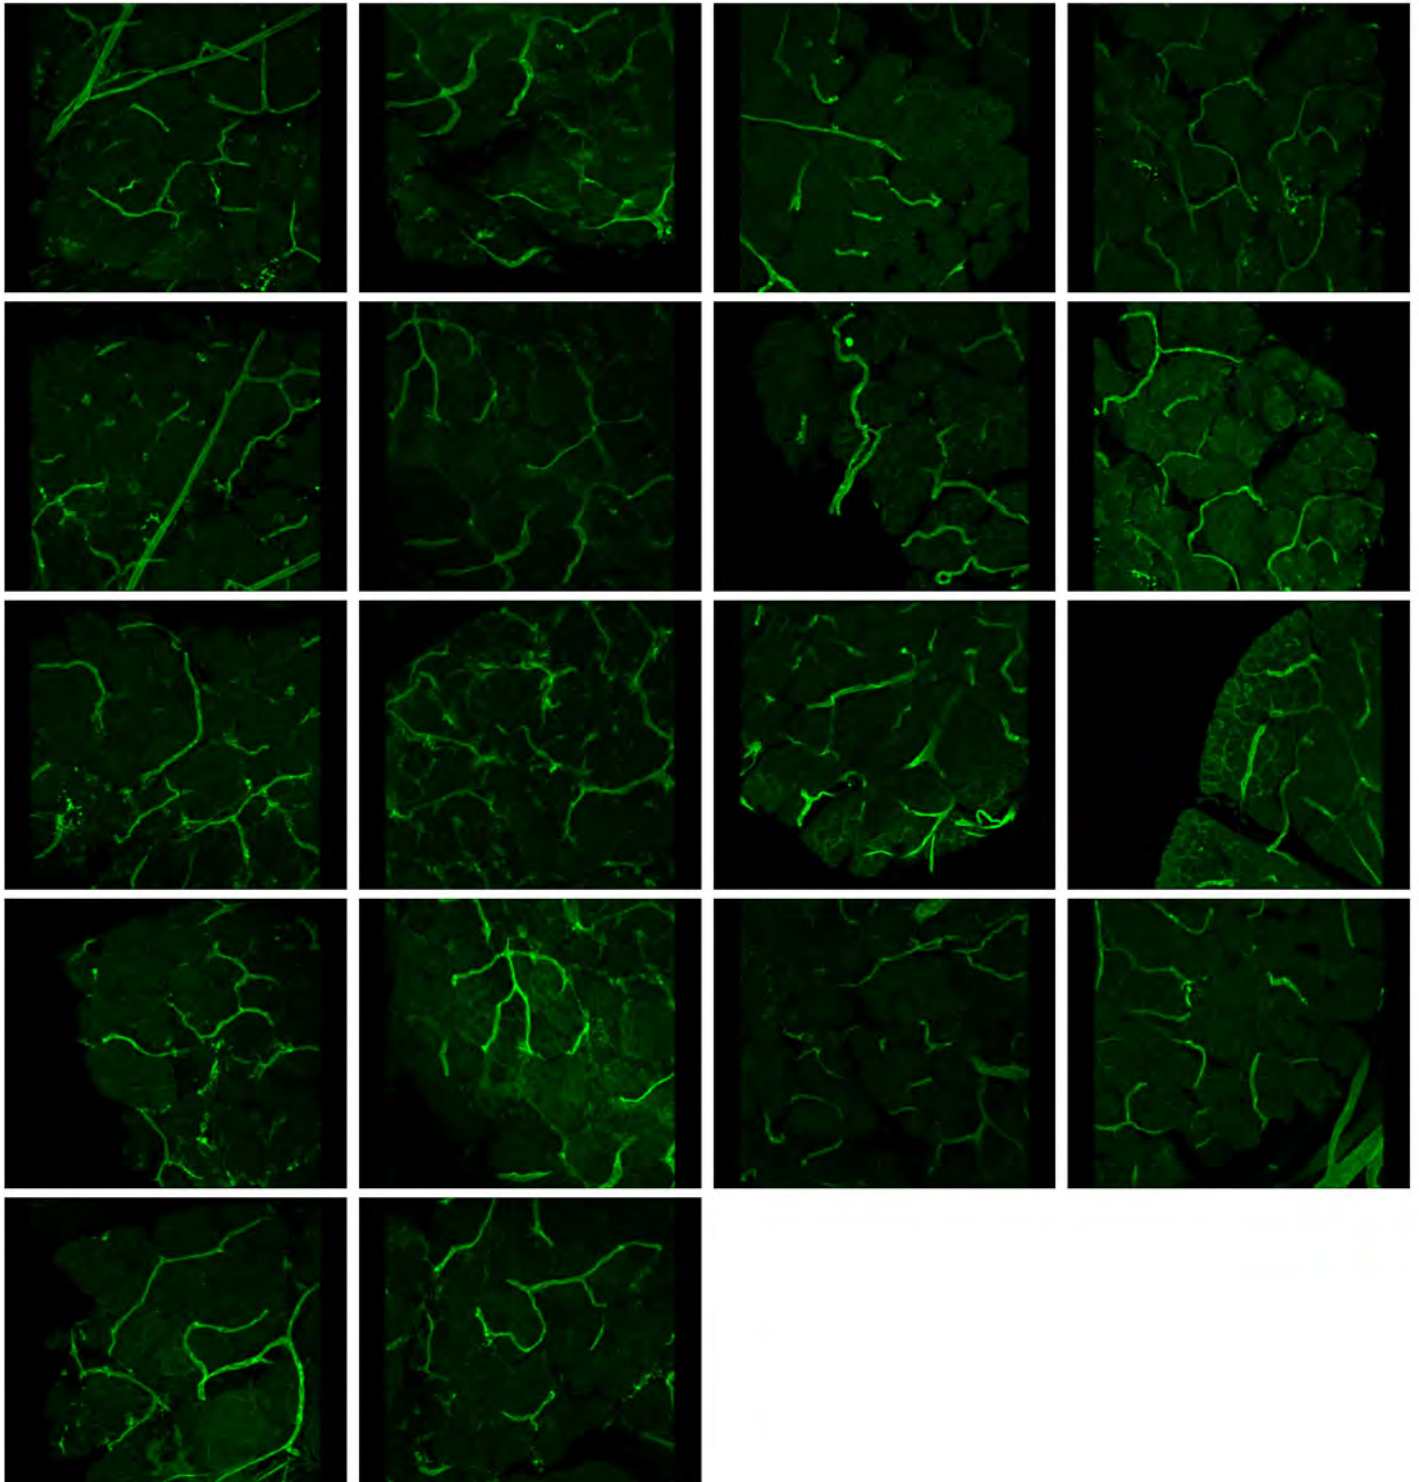

**Figure 2**

**NOD**

**BALB/c**

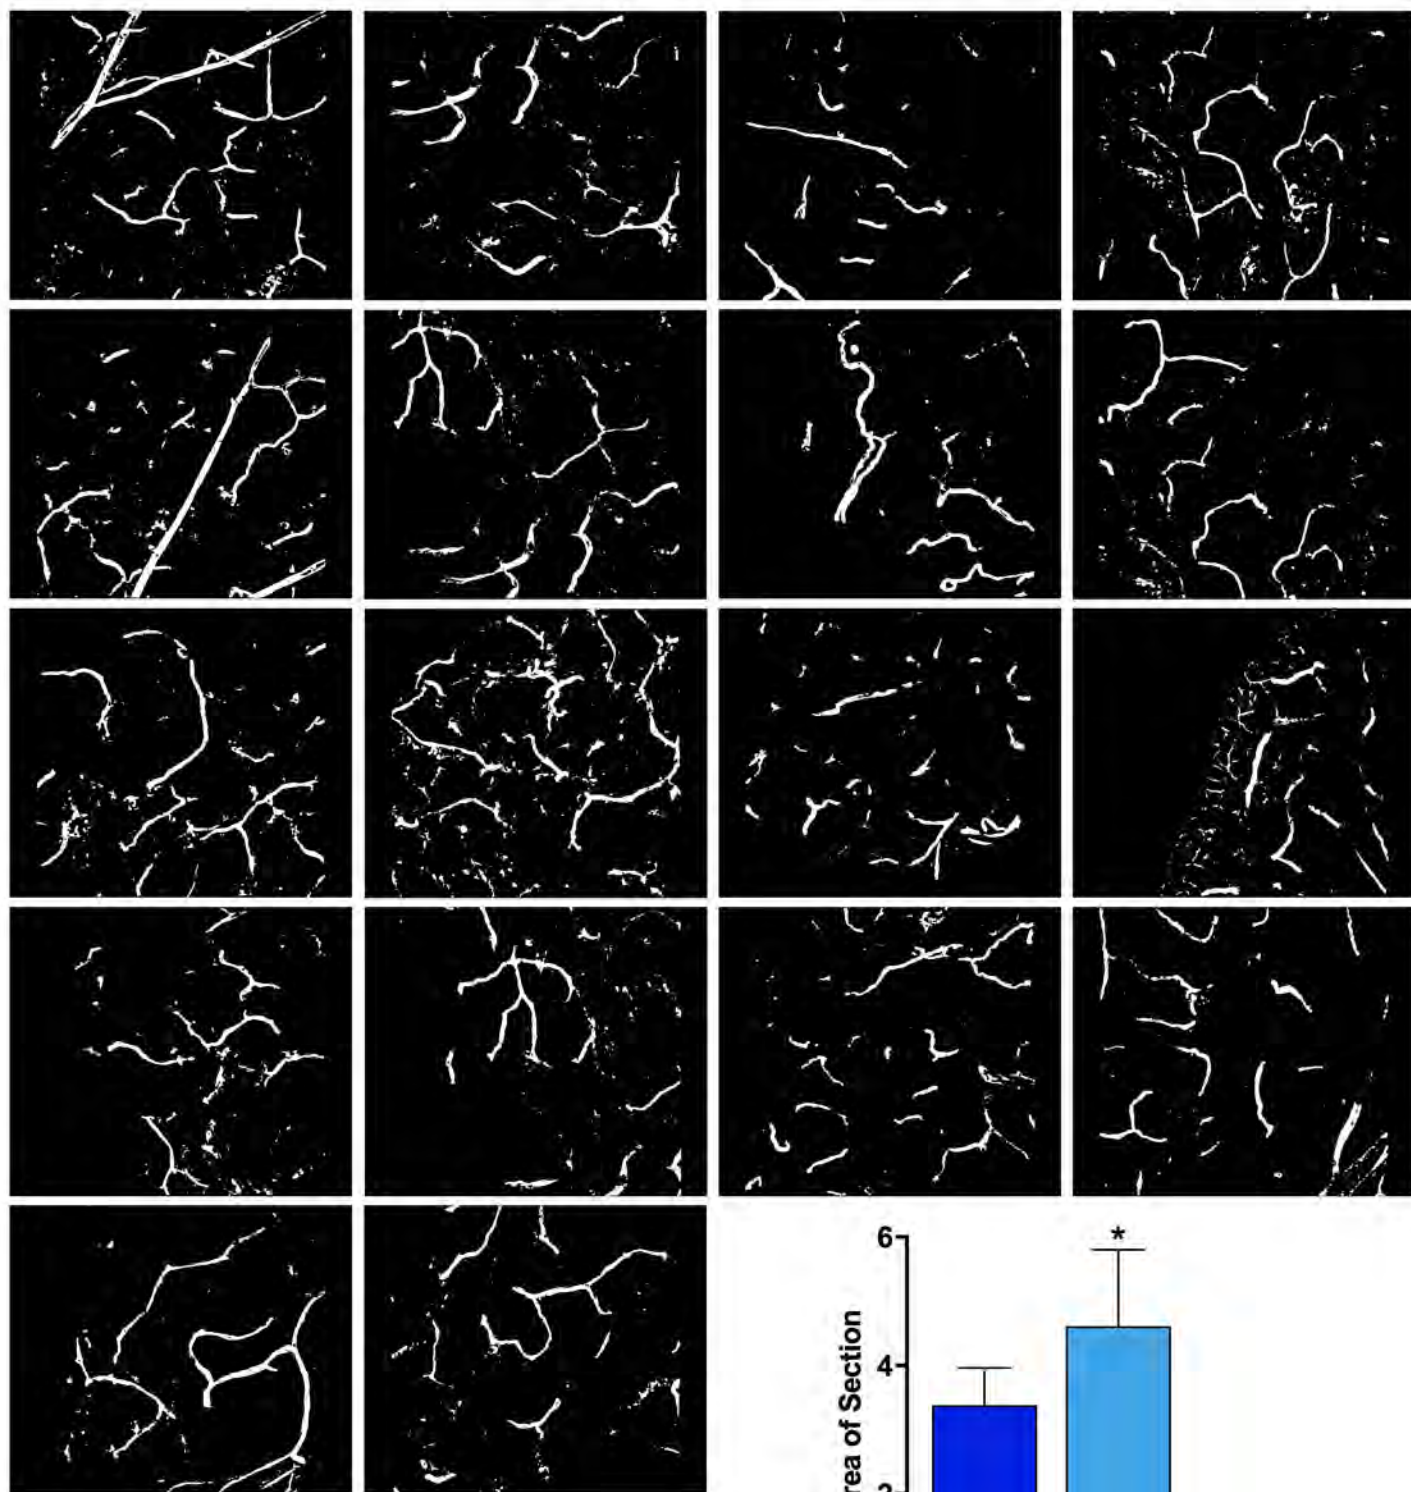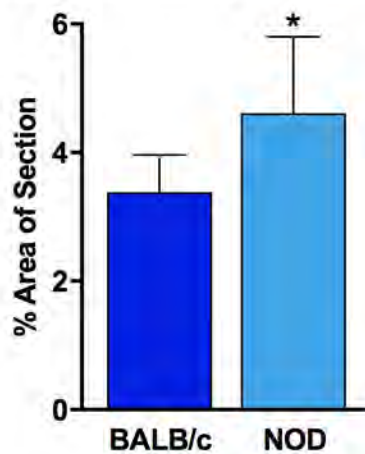



Figure 3 **BALB/c**

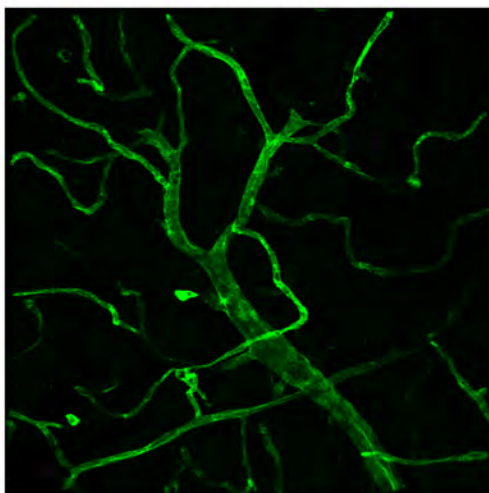

**NOD**

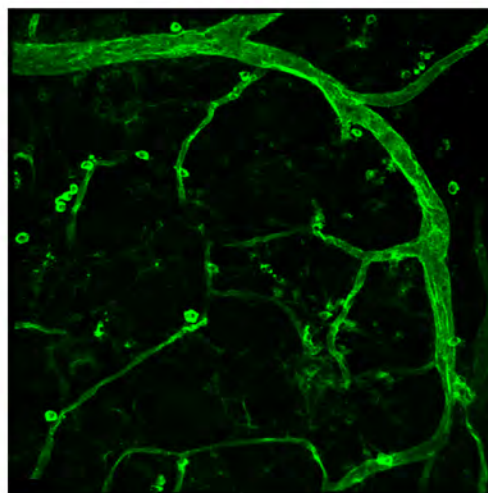

Supplement: 41598_2018_28227_MOESM1_ESM.pdf [file 41598_2018_28227_MOESM1_ESM.pdf]
